# Supplementary material for: Rodent Model of Brain Radionecrosis Using Clinical LINAC-Based Stereotactic Radiosurgery
Source: PubMed Central journal article supplement — Adv Radiat Oncol. 2022 Jul 19;7(6):101014. doi: 10.1016/j.adro.2022.101014 (PMC9436710; doi:10.1016/j.adro.2022.101014), 2022-07-19
Supplement: mmc1.pdf [file mmc1.pdf]

## SUPPLEMENTAL FIGURES

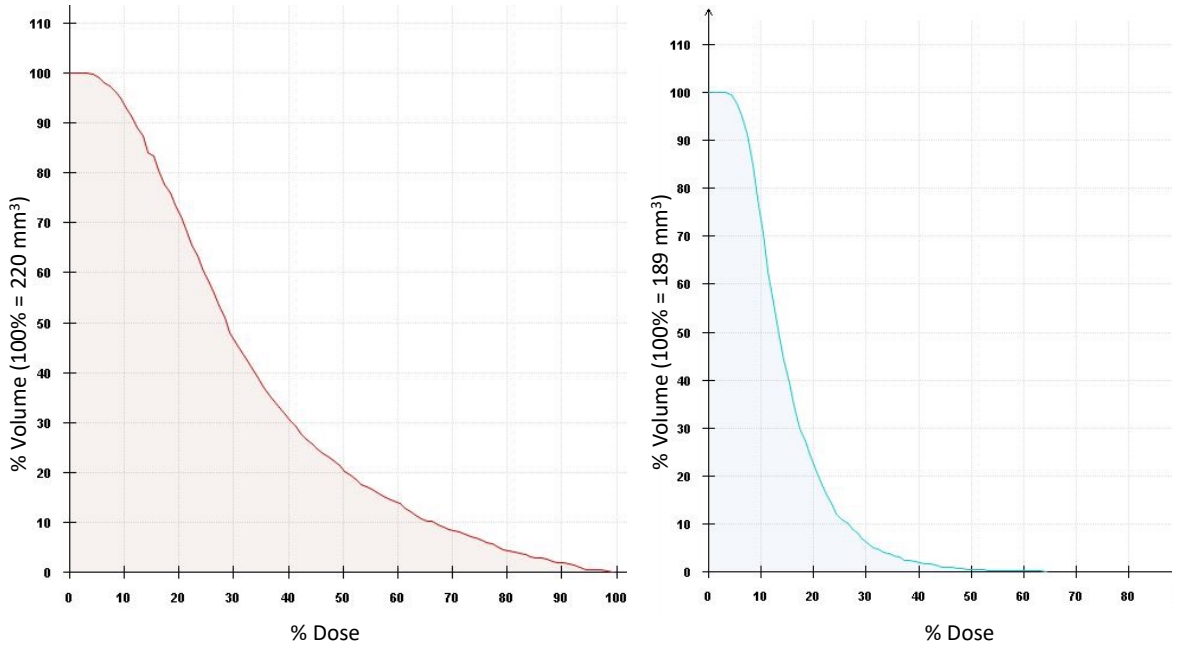

**Supplemental Figure S1.** Dose-volume histograms of ipsilateral (left) and contralateral (right) hemispheres in mice. Maximum dose in the contralateral hemisphere is 65%.

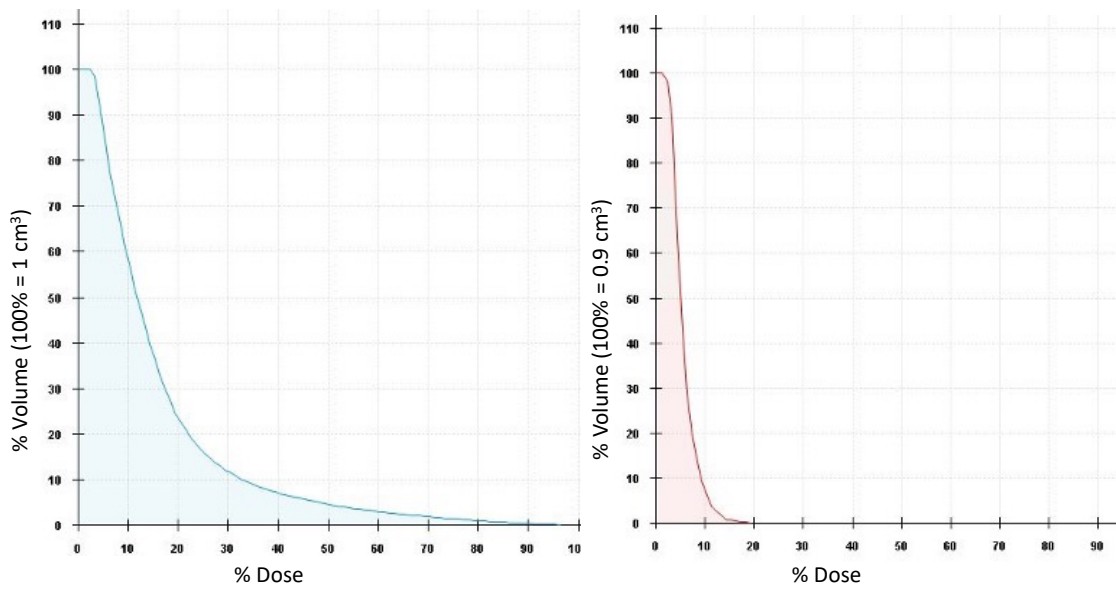

**Supplemental Figure S2.** Dose-volume histograms of ipsilateral (left) and contralateral (right) hemispheres in rats. Maximum dose in the contralateral hemisphere is 32%.
